# Supplementary material for: Engagement with HIV Prevention Treatment and Care among Female Sex Workers in Zimbabwe: a Respondent Driven Sampling Survey
Source: PLoS One. 2013 Oct 15;8(10):e77080. doi: 10.1371/journal.pone.0077080 (PMC3797143; doi:10.1371/journal.pone.0077080)
Supplement: Table S1 — Respondent driven sampling questionnaire – English version. (XLSX) [file pone.0077080.s001.xlsx]

## Sheet: questionnaire
RDS Network Questions
No.		Questions and filters											Skip to
RDS	01	How many sex workers do you
		know personally
		i.e. who are living in Mutare,
		are aged 18 or over you know their name
		and who they are and they know you?
RDS	02	How many of those sex workers
		whom you know personally
		have you seen in the past month?
RDS	03	How many of those sex workers
		whom you know personally
		would you consider
		recruiting into this study?
SECTION C: DEMOGRAPHIC CHARACTERISTICS
"I would first like to ask you some questions about yourself and your background"
No.		Questions and filters											Skip to
C	01	How old are you?											STOP INTERVIEW
							years old						IF UNDER 18
C	02	In what year were you born?
C	03	How long have you been													If respondent has always lived in the city, then the number of years should match their age
		living in XXXXXX?					years
		If less than 1 year insert 00
		If less than 1 month STOP survey
C	04	Where did you live before?
		(last place)		Town		……………………
C	05	What is your educational									Never enrolled	0
		level?									Primary school - incomplete	1
											Primary school - complete	2
		[Do not read out response									Secondary school - incomplete	3
		options]									Secondary school - complete	4
											High school or higher - incomplete	5
											High school or higher - complete	6
											Don't know	8
											No response	9
C	06	During the last month,									My own (or my spouse or partner's) house	1
		where did you live									or flat (rented or owned )
		most of the time?									With family or relatives	2
		[Do not read out response									With friends	3
		options. Circle one response]									Dormitory, hostel, or lodge	4
											No fixed address (e.g. street, park,
											abandoned building)	5
											Other (specify) ……………………………	6
											Don't know	8
											No response	9
C	07	What is your marital status?									Single (never married)	1
											Living with partner
											Married, living with husband	2
											Married, NOT living with husband	3
											Divorced	4
											Widowed	5
											Don't know	8
											No answer	9
C	08	Which of the following
		documents do you presently have?
		(read out & tick those that apply)	Birth certificate							Y		N
			National identification card							Y		N
			Health card							Y		N
			Passport							Y		N
			OTHER
C	09	How long have you been
		working as a sex worker?					years
		By "sex worker" I mean that
		you have exchanged sex for
		money
		If less than 1 year insert 00
		If less than 1 month, STOP survey
C	10	Where do you get your clients
		from?
		[read out each option]
		[Check all that are mentioned]
	a	Bars/nightclubs/		Yes
		entertainment areas
	b	Telephone/ at home		Yes
	c	Market stalls		Yes
	d	On the street		Yes
	e	In lodges		Yes
	f	Other		Yes
						WRITE IN
C	11	Which type of location is									Bars/nightclubs/	1
		where you get the most of									entertainment areas
		your clients?									Telephone/ at home	2
											Market stalls	3
		(read list out again, and pick just 1)									On the street	4
											In lodges	5
											Other	6
											Don't know	8
											No answer	9
SECTION D: SOCIAL SUPPORT/COMMUNITY IDENTITY
"These next questions are about your relationships with other sex workers
in your community, your friendships, and work conditions."
No.		Questions and filters											Skip to
D	01	In general, how would you describe									Very good	1
		your relationship with									Good	2
		the other sex workers in									Neither good nor bad	3
		Mutare?									Bad	4
											Very bad	5
		(read out options)									No relationship with other SW	6
											Don't know	8
											No response	9
D	02	How many sex workers do
		you consider to be your close friends?
		By close, I mean that you could
		talk to them about your personal
		problems
		Please state whether you
		strongly agree, agree, neither
		agree or disagree, disagree or
		disagree strongly with the following
		statements:
D	03	Sex workers support each
		other at work									Strongly Agree	1
											Agree	2
		(read out options again									Neither agree nor disagree	3
		if necessary)									Disagree	4
											Strongly Disagree	5
											Don't know	8
											No response	9
D	04	My colleagues will support me									Strongly Agree	1
		if I refuse sex with a client									Agree	2
											Neither agree nor disagree	3
		(read out options again									Disagree	4
		if necessary)									Strongly Disagree	5
											Don't know	8
											No response	9
D	05	My colleagues will help me									Strongly Agree	1
		if they see a client become									Agree	2
		aggressive or violent									Neither agree nor disagree	3
											Disagree	4
		(read out options again									Strongly Disagree	5
		if necessary)
											Don't know	8
											No response	9
D	06	I feel comfortable									Strongly Agree	1
		talking to other sex workers									Agree	2
		about work related issues									Neither agree nor disagree	3
											Disagree	4
		(read out options again									Strongly Disagree	5
		if necessary)
											Don't know	8
											No response	9
D	07	I feel comfortable									Strongly Agree	1
		asking other sex workers									Agree	2
		about health topics									Neither agree nor disagree	3
											Disagree	4
		(read out options again									Strongly Disagree	5
		if necessary)
											Don't know	8
											No response	9
D	08	There is a lot of competition									Strongly Agree	1
		between women working here									Agree	2
											Neither agree nor disagree	3
		(read out options again									Disagree	4
		if necessary)									Strongly Disagree	5
											Don't know	8
											No response	9
D	9	Sex workers can work									Strongly Agree	1
		together to improve their									Agree	2
		working conditions									Neither agree nor disagree	3
											Disagree	4
		(read out options again									Strongly Disagree	5
		if necessary)
											Don't know	8
											No response	9
D	10	In the past month, would you									Freqyently	1
		say that you talked to other									At least once a week	2
		sex workers about work									Rarely	3
											Never	4
		(read out options)
											Don't know	8
											No response	9
D	11	In the past month, did you									YES	1
		ask another sex worker									NO	2
		for help at work?
		(Help can include providing
		information or condoms, referring
		to services, lending money, or									Don't know/don't remember	8
		assisting with clients)									No response	9
D	12	In the past month, did you									YES	1
		provide help at work									NO	2
		to another sex worker?
		(Help can include providing
		information or condoms, referring
		to services, lending money, or									Don't know/don't remember	8
		assisting with clients)									No response	9
SECTION E: ALCOHOL USE
No.		Questions and filters											Skip to
E	01	In the past 12 months,									Never	1		section F
		how often did you drink alcohol?									Once a month or less	2
											2-4 times a month (just weekends)	3
		(read out options)									2-3 times a week	4
											Don't remember	8		section F
											No response	9		section F
E	02	What type of alcohol						Homebrewed Beer				1
		do you drink most often?						Bottled Beer				2
								Wine				3
		(read out options)						Cider				4
								Spirits				5
								Don’t know				8
								No response				9
SECTION F: HIV KNOWLEDGE
" I now want to ask you about your knowledge of HIV, the virus that causes AIDS"
No.		Questions and filters	Coding categories										Skip to
F	01	How can HIV (the virus that
		causes AIDS) be contracted?
		Do not read out responses
		[Check all that are mentioned and ignroe
		other options given]
	a	Unprotected Sex		Yes
	b	From a mother to her baby		Yes
		during pregnancy/childbirth
	c	Breastfeeding		Yes
	d	Sharing injecting drug equipment		Yes
	e	Don't know any ways		Yes
F	02	Can using condoms									Yes	1
		reduce the risk									No	2
		of HIV transmission?									Don't remember	8
											No response	9
F	03	Can a healthy-looking									Yes	1
		person have HIV?									No	2
											Don't remember	8
											No response	9
F	04	Can a person get HIV									Yes	1
		from mosquito bites?									No	2
											Don't remember	8
											No response	9
F	05	Can a person get HIV									Yes	1
		by sharing a meal with someone									No	2
		who is infected?									Don't remember	8
											No response	9
SECTION G: SEXUAL BEHAVIOUR
"I am now going to ask you some questions about your sexual behaviour.
I want to assure you again that all your responses will be kept strictly confidential
First we are talking about vaginal sexual intercourse by which we mean penis-in-vagina"
No.		Questions and filters	Coding categories										Skip to
G	1	How old were you when you
		had vaginal intercourse					years old
		for the first time?
G	2	Have you had vaginal									Yes	1
		intercourse in the last									No	2		G04
		month?									No response	9
G	3	With how many people in last
		month? (approximately)
		(include paying and non-paying
		partners)
" We now want to ask some questions about anal sex (penis in anus)"
G	4	Have you ever had anal sex?									Yes	1
											No	2		G05
											No response	9
G	5	How old were you when you
		had anal sex					years old
		for the first time?
G	6	Have you had anal sex									Yes	1
		in the last month?									No	2		G08
											No response	9
G	7	With how many people in last
		month? (approximately)
		(include paying and non-paying partners)
G	8	How old were you when you
		first received money						Years old
		in exchange for vaginal
		or anal sex (started sex work)?			[If don't know 88; no response 99]
SEX WITH DIFFERENT PARTNERS IN THE LAST MONTH
We now want to ask about your sexual relationships in the last month. From talking to many people
about partners they have (vaginal, anal and oral) sex with, we understand that
there are different kind of partners
Let me read out to you- and please ask me if any of these descriptions are not clear
Permanent partner: a husband, or a boyfriend with whom there is an expectation of commitment to a longer term relationship
Commercial partner/client: a partner who pays money in return for sex
SECTION H: SEX WITH STEADY PARTNERS
SO FIRST, we will be asking about steady partners
H	01	Do you currently have a permanent									Yes	1
		partner (including a husband)?									No	2		G09
H	02	How long have you been with									less than a year	1
		this partner?									longer than a year	2
H	03	In the past month, how many
		times did you have sex with
		your permanent partner?			number of times
H	04	The last time you had sex with									Yes	1
		your permanent partner, did you									No	2
		use a condom?									Cannot remember	3
H	05	In the past month, how often									Always (100%)	1
		did you use condoms with your									Most of the time (75%)	2		H07
		steady partner?									About half of the time (50%)	3		H07
											Sometimes (25%)	4		H07
		(Read out options)									Rarely (under 10%)	5		H07
											Never	6		H07
H	06	Think again about the past month,
		has there ever been an occasion									Condom use every time	1
		you did NOT use a condom with									There has been an occasion of non use	2
		your permanent partner?
H	07	In the past month, how often										1
		did you yourself suggest									Most of the time (75%)	2
		using a condom to									About half of the time (50%)	3
		a permanent partner?									Sometimes (25%)	4
											Rarely (under 10%)	5
		(Read out answers)									Never	6
H	08	How many permanent partners have
		you had in the last 12 months?
		(include the current one for			number of steady partners
		those who have one)
H	09	During the past 12 months									YES	1
		has any permanent partner									NO	2
		partner been physically
		against you?
		By "physically violent", I mean
		has pushed, hit, punched or									Don't know	8
		kicked you									No response	9
H	10	During the past 12 months									YES	1
		has any steady partner									NO	2
		partner been sexually violent
		against you?
		By "sexually violent", I mean
		has forced you to have sex
		or forcibly touched you in
		a sexual way that you did not									Don't know	8
		want									No response	9
SECTION J: COMMERCIAL PARTNERS/CLIENTS
Now I want to ask about partners that have paid money or given you goods or money to have sex with you
we will call these partners commercial partners or clients
J	01	In the last month, have you									Yes	1
		had sex with a commercial									No	2		J08
		partner?
J	02	In the past month how
		many commercial partners
		did you have sex with?		number of commercial partners
		Please try to remember carefully
J	03	How many of these
		commercial partners
		were new clients (you had sex		number of new commercial partners
		with them for the first time)?
J	04	The last time you had sex with									Yes	1
		a commercial partner, did you									No	2
		use a condom?									Cannot remember	3
											No response	9
J	05	In the past month, how often										1
		did you use condoms with your									Most of the time (75%)	2		J08
		commercial partners?									About half of the time (50%)	3		J08
											Sometimes (25%)	4		J08
		(Read out answers)									Rarely (under 10%)	5		J08
											Never	6		J08
J	06	Think again about all your
		commercial partners in the last month									Condom use every time	1
		has there ever been an occasion									There has been an occasion of non use	2
		you did NOT use a condom?
J	07	In the past month, how often										1
		did you yourself suggest									Most of the time (75%)	2
		using a condom to a client?									About half of the time (50%)	3
											Sometimes (25%)	4
		(Read out answers)									Rarely (under 10%)	5
											Never	6
J	08	During the past 12 months									YES	1
		have any of your commercial									NO	2
		partners/clients been physically violent
		against you?
		By "physically violent", I mean
		has pushed, hit, slapped,									Don't know	8
		punched or kicked you									No response	9
J	09	During the past 12 months									YES	1
		have any of your commercial									NO	2
		partners/clients been sexually violent
		against you?
		By "sexually violent", I mean
		has forced you to have sex
		or forcibly touched you in
		a sexual way that you did not									Don't know	8
		want									No response	9
SECTION K: HEALTH SERVICE USE
K	01	Where can sex workers here
		get condoms?
		Do NOT read responses		Probe for "anywhere else?"
		[Check all that are mentioned]
	a	Don't know of any place
	b	Pharmacy
	c	Grocery store
	d	News stands/petrol stations
	e	Friends
	f	Peer educators
	g	Outreach workers
	h	XXXXXX clinic
	i	Other........................
K	02	In the past year, from where												K04
		did you obtain condoms?
		Do NOT read responses
		[Check all that are mentioned]
	a	Didn't obtain any condoms
	b	Pharmacy
	c	Grocery store
	d	News stands/petrol stations
	e	Friends
	f	Peer educators
	g	Outreach workers
	h	XXXXXXX clinic
	i	Other........................
K	03	What is your
		main source?
		Do NOT read responses		Main source
		[Check all that are mentioned]		(tick one only)
	a	Pharmacy
	b	Grocery store
	c	News stands/petrol stations
	d	Friends
	e	Peer educators
	f	Outreach workers
	g	Sukubva clinic
	h	Other........................
K	04	During the last year, have
		you had genital sores, ulcers or									Yes	1
		unusual genital discharge?									No	2		K06
											Don't know	8
											No response	9
K	05	The last time you had genital
		sores, ulcers or unusual
		genital discharge, what did
		you do? (tick all that are mentioned)
					Probe for "anything else?"
		Do NOT read responses
		[Check all that are mentioned]
	a	Did not do anything
	b	Went to government health
		facility for examination
		and treatment
	c	Went to private health
		clinic or doctor
		and treatment
	d	Went to pharmacy to buy drugs
	e	Went to traditional healer
		for examination and treatment
	f	Cured myself at home
	g	Stopped having sex
	h	Talked to outreach workers for
		advice
	h	Talked to peer educators for
		advice
	i	Other .................................
K	06	In the past 12 months, have you		Yes		No						NO		K08
		gone to the XXXXX nic?
K	07	How many times have you gone?
		(approximately)
				Number of times
K	10	In the past 12 months, have you		Yes		No						NO		L01
		had contact with a peer educator?
K	11	How often do you have									Once a week or more	1
		contact with a peer educator?									2-3 times per month	2
											About once a month	3
											Less than once a month	4
											Don't know/can't remember	8
											No response	9
K	12	I would now like to talk to you									Yes	1		L01
		about what you do to prevent									No	2
		pregnancy.
		Are you currently pregnant?									Don't know/can't remember	8
											No response	9
K	13	Would you like to get pregnant									Yes	1		L01
		right now?									No	2
											Don't know	8
											No response	9
K	14	Are you currently using any method									Yes	1
		to prevent a pregnancy?									No	2		L01
											Don't know	8		L01
											No response	9		L01
K	15	What methods are you using to
		prevent a pregnancy?
					Probe for "anything else?"
		Do NOT read responses
		[Check all that are mentioned]
	a	Condoms (male or female)
	b	Pills
	c	Injectibles (Depo)
	d	IUD
	e	Have been sterilised
	f	Traditional methods
	i	Other .................................
SECTION L: HIV TESTING & TREATMENT
L	01	Where is it possible to have
		a voluntary HIV test aroun here?		Tick all that are mentioned
		Do NOT read responses		Probe for "anywhere else?"
		[Check all that are mentioned]
	a	Hospital
	b	AIDS Centre
	c	Sakubva Clinic
	d	Antenatal clinic
	e	Private doctor/ clinic
	f	New Start Centre
	g	Other _________________
L	02	Have you ever had an HIV test?									Yes	1
											No	2		M 01
											No response	9
L	03	Have you had an HIV test									Yes	1
		in the past 6 months?									No	2
		(Read an approximate date									No response	9
		out for when 6 months ago was)
L	04	Where did you last get tested
		for HIV? [tick one box only]
		Do NOT read responses
		[Check all that are mentioned]
	a	Hospital
	b	AIDS Centre
	c	XXXXXXX Clinic
	d	Antenatal clinic
	e	Private doctor/ clinic
	f	New Start Centre
	g	Other _________________
L	05	What was your most									HIV+	1
		recent test result?									HIV-	2		M01
											Didn't get results	3		M01
											Don't know	8
											No response/ refuse to answer	9
L	06	Are you receiving									Yes	1
		antiretroviral treatment?									No	2		M01
											No response	9
L	07	Where are you receiving
		treatment for HIV? [tick one box only]
	a	Hospital
	b	AIDS Centre
	c	XXXXXXX Clinic
	d	Antenatal clinic
	e	Private doctor/ clinic
	f	New Start Centre
	g	Other _________________
SECTION M: CONTACT WITH THE POLICE
" I now want to ask you about the contact you have with the police "
M	01	In the last month, how
		many times have you been
		stopped or harassed by						times
		the police?
M	02	During the past month									YES	1
		has any member of the police									NO	2
		been physically violent
		against you?
		By "physically violent", I mean
		has pushed, hit, slapped,
		punched or kicked you									Don't know	8
											No response	9
M	03	During the past month									YES	1
		has any member of the police									NO	2
		been sexually violent
		against you?
		By "sexually violent", I mean
		has forced you to have sex
		or forcibly touched you in
		a sexual way that you did not									Don't know	8
		want									No response	9
		SECTION N: INTEREST IN A SOCIAL PROGRAMME FOR SEX WORKERS
		" We are thinking of starting a drop in centre for sex workers,
		to give women an opportunity to meet each other and discuss shared concerns.
		I would now like to ask you about your interest in such an idea."
N	01	If there was a drop in centre in									YES	1
		Mutare for sex workers,									NO	2
		would you attend it?
											Don't know	8
											No response	9
N	02	Do you think other sex workers									YES	1
		would attend a drop in centre?									NO	2
											Don't know	8
											No response	9
